# Supplementary material for: Approaching Thrombospondin-1 as a Potential Target for Mesenchymal Stromal Cells to Support Liver Regeneration after Partial Hepatectomy in Mouse and Humans
Source: MDPI journal article supplement (doi:10.3390/cells13060529), 2024-03-17
Supplement: s1 [file s1]

## **Approaching thrombospondin-1 as a potential target for mesenchymal stromal cells to support liver regeneration after partial hepatectomy in mouse and humans**

Lysann Tietze, Madlen Christ, Jiyeon Yu, Peggy Stock, Sandra Nickel, Annelie Schulze, Michael Bartels, Hans-Michael Tautenhahn, Bruno Christ

**Supplementary File**

## Supplementary Results

**Figure S1.** Gating strategy for the detection of activated platelets by flow cytometry

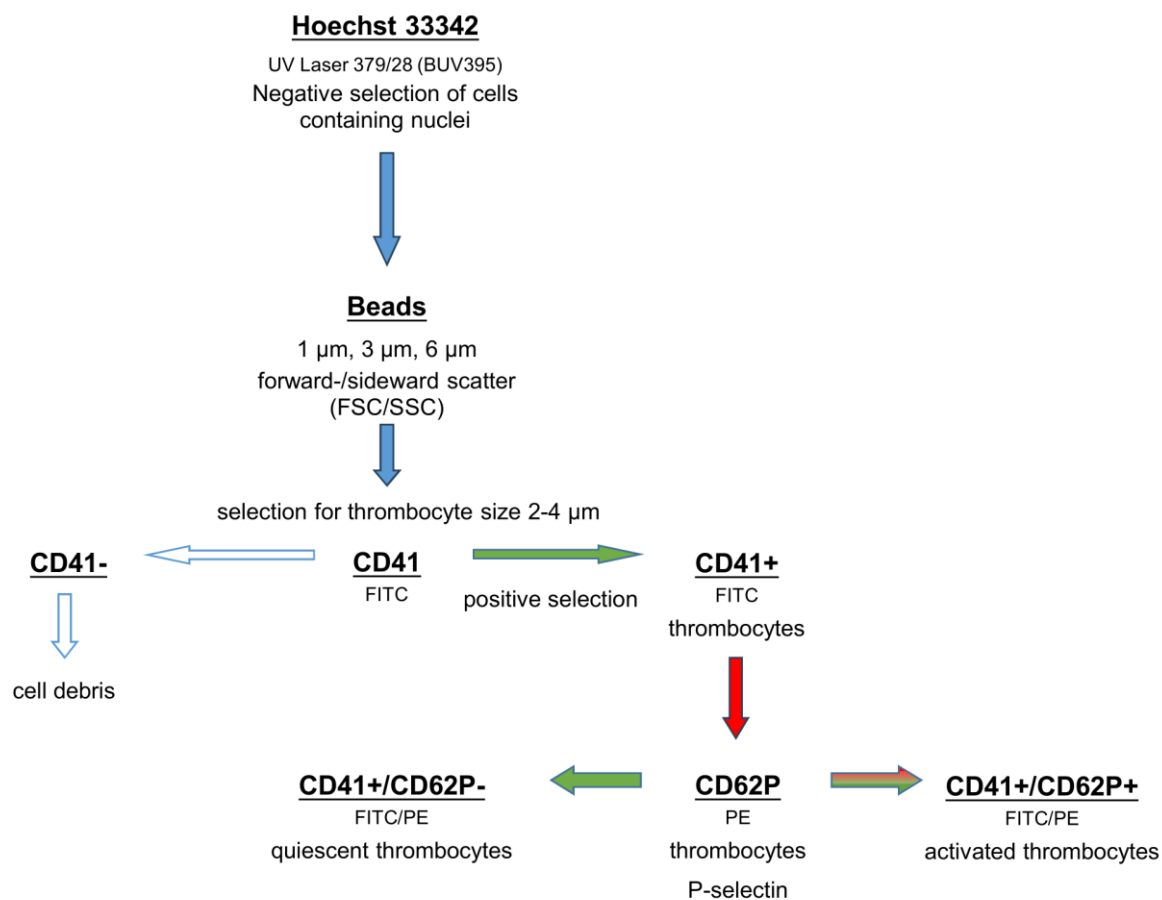

In a first step, nuclei-containing cells were excluded by nuclear staining with Hoechst 33342. Then, thrombocytes were enriched by size exclusion. Finally, total thrombocytes were selected by the expression of CD41, and activated thrombocytes by co-expression of CD62P. For further details, cf. main manuscript.

**Figure S2.** hBM-MSC attenuate deterioration of hepatic tissue integrity after two-thirds partial hepatectomy

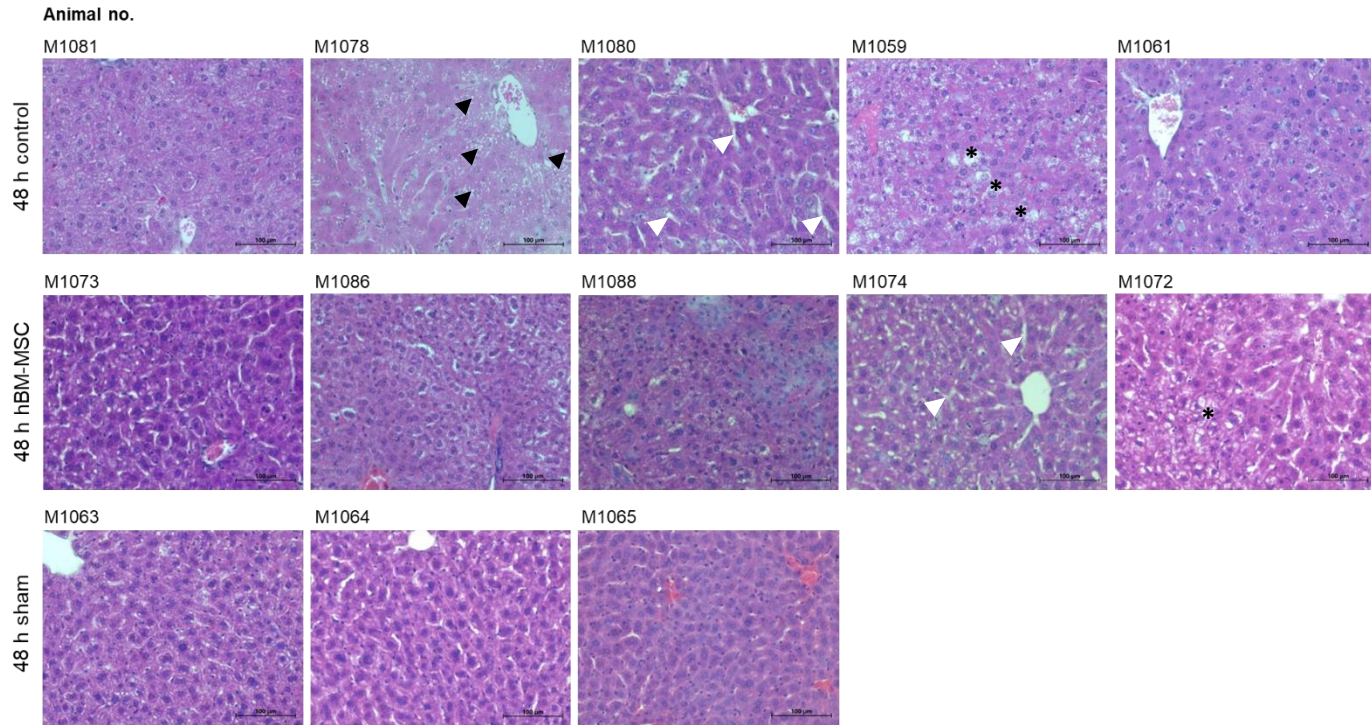

After partial hepatectomy, C57BL/6J mice were either left untreated (control) or treated with hBM-MSC. In the sham-treated group, laparotomy and closure was performed, only. Livers were collected 48 h after surgery and paraffin sections (2  $\mu$ m) stained with hematoxylin-eosin. Representative pictures were taken from 3 and 5 different animals (animal identity is indicated by numbers above images) in the sham and treatment groups, resp. Surgery-induced tissue damage is observed in the control group, which is less pronounced after hBM-MSC treatment. Black arrowheads – lipid accumulation; white arrowheads – widened sinusoids; asterisks – necrotic hepatocytes.

**Figure S3.** Immunohistochemical detection of proliferating liver cells after two-thirds partial hepatectomy by Ki67 staining

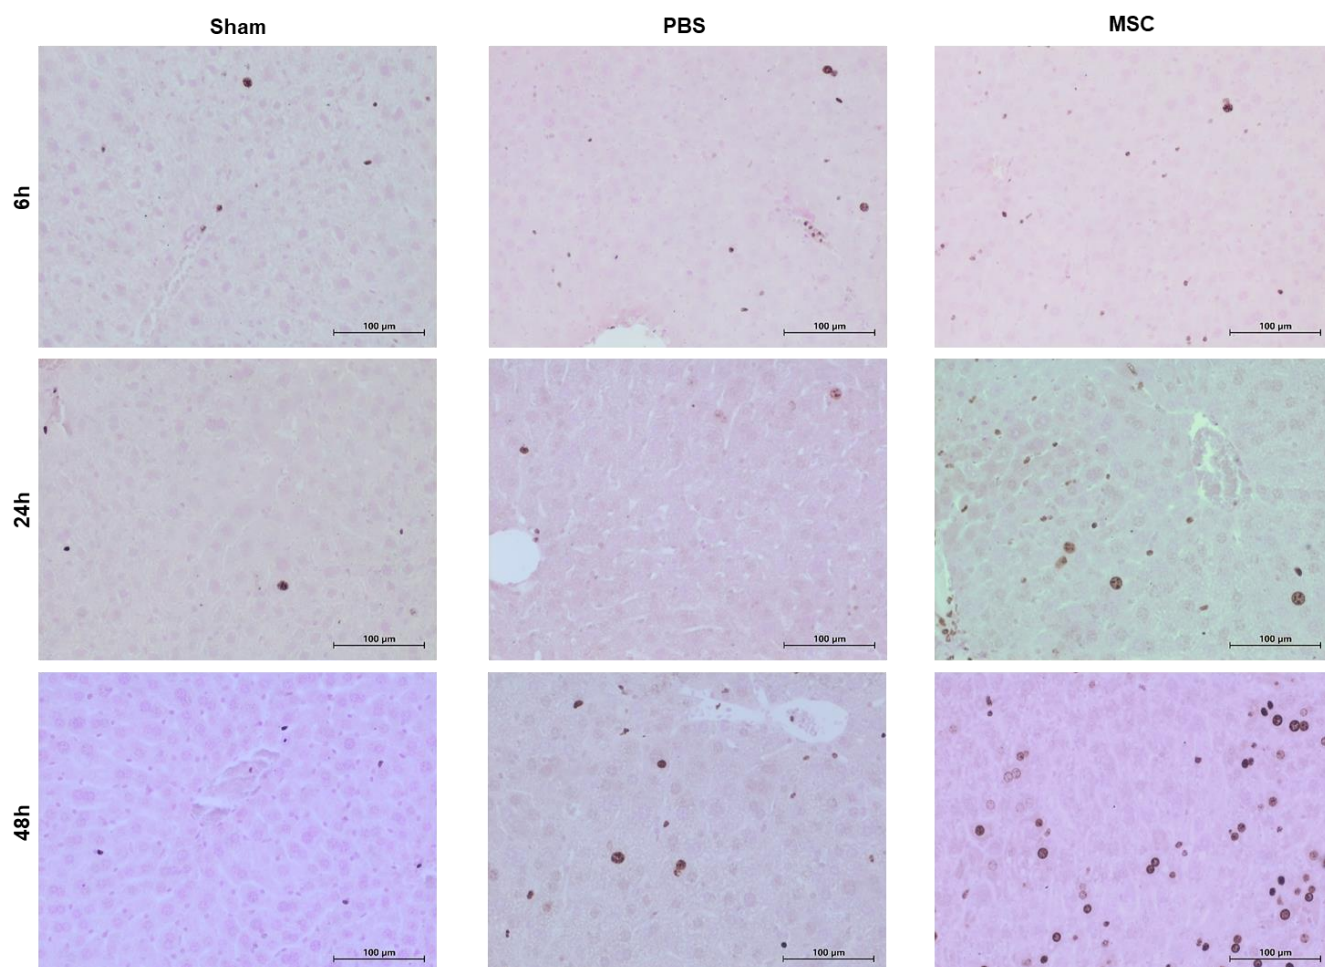

Immunohistochemical detection of Ki67 demarcating proliferating liver cells (brown staining) at the times indicated after partial hepatectomy. Pictures were used to determine the amount of proliferating cells out of total hepatic cells as shown in Figure 1B in the main manuscript. Pictures shown are representative for 3 animals in the sham and 5 animals in the control and the hBM-MSC-treated group each. 15 microscopical fields (orig. magnification – 20x) were counted and used for quantification with the ImageJ software as described in the Materials and Methods section of the main manuscript.

**Figure S4.** hBM-MSC treatment does not decrease blood levels of TGF- $\beta$ 3 after two-thirds partial hepatectomy

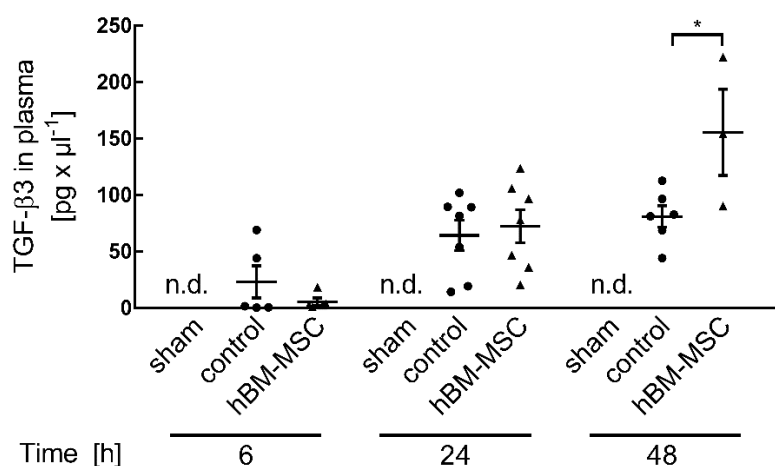

TGF- $\beta$ 3 was measured by ELISA in plasma supernatants after centrifugation of blood samples taken at the time points indicated. Values are means  $\pm$  SEM from 3 (sham) and 3-7 animals in the control and hBM-MSC groups, respectively, as indicated by the single data points. To assess for data normality, the Shapiro-Wilk and the Kolmogorov-Smirnov tests were used. The tests confirmed normal distribution. Further statistical analysis between the different treatments was performed using the Student's t-test. Values are significantly different at the  $P$ -level of  $*\leq 0.05$ . n.d. – not determined.

**Figure S5.** hBM-MSC attenuate deterioration of tissue integrity after two-thirds partial hepatectomy

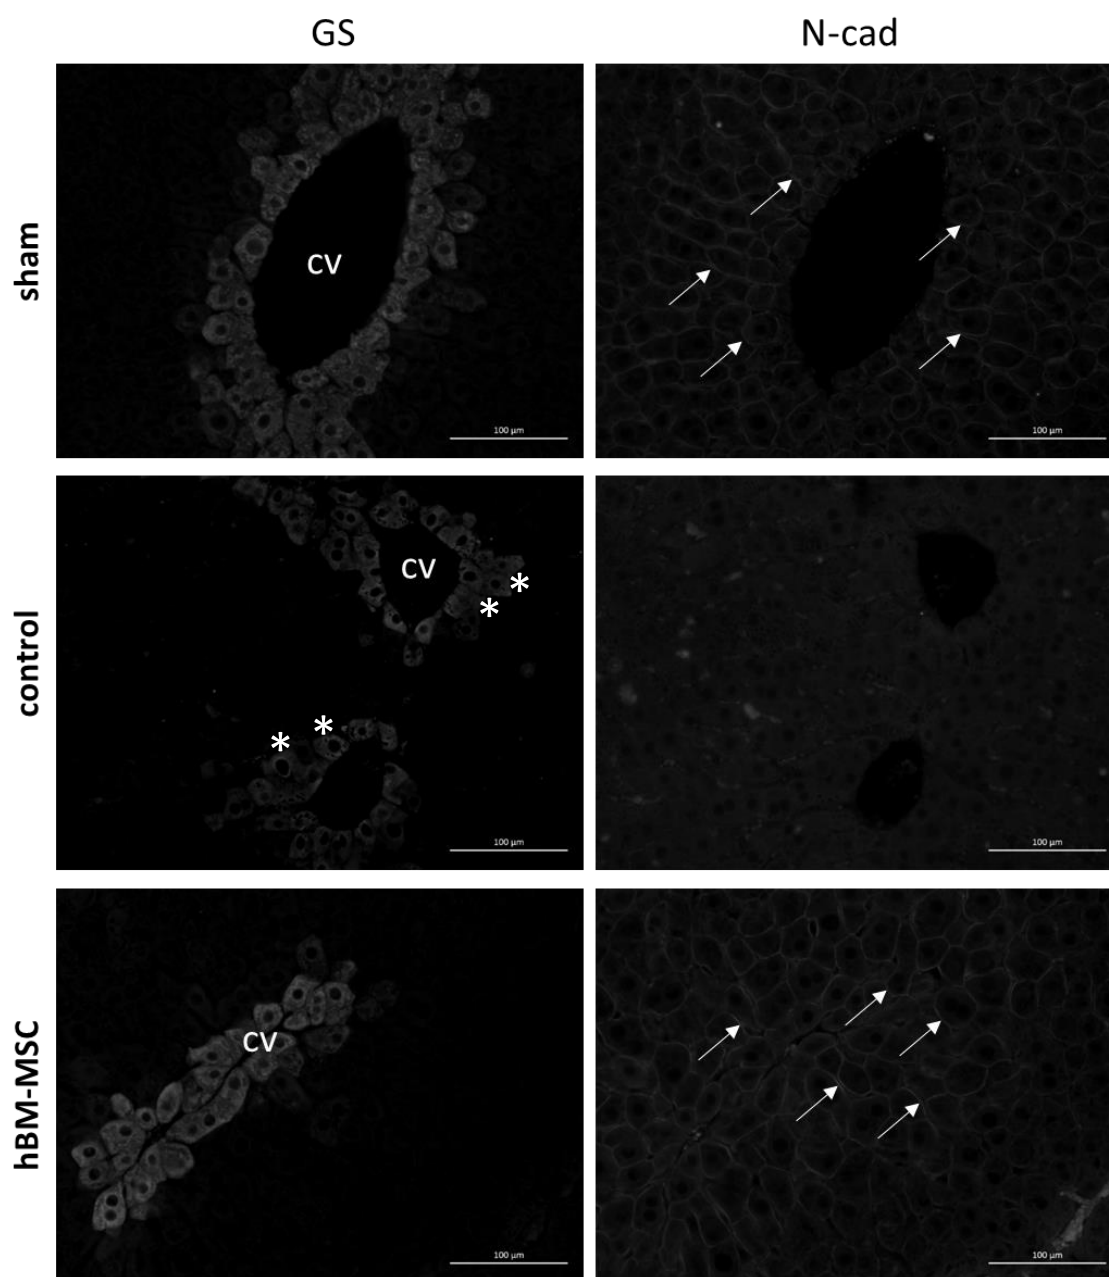

Immunofluorescent co-detection of N-cadherin (left) and glutamine synthetase (GS, right) in liver tissue sections 48 h after partial hepatectomy. While N-cadherin demarcates epithelial cell-cell contacts predominantly in hepatocytes lining the proximal branches of the central vein (cv), GS is expressed in a few cell layers of hepatocytes surrounding the central vein. N-cadherin expression indicates epithelial cell-cell contacts between hepatocytes in sham-treated animals (right upper panel; white arrows). Partial hepatectomy diminishes abundance of N-cad, which is hardly visible. Expression of GS in pericentral hepatocytes becomes blurry (left middle panel, asterisks). Treatment with hBM-MSC restores expression of GS (left lower panel) and N-cad (right lower panel) comparable to sham-treated animals. Images shown are representative for different tissue slices from 2-5 mice out of the different groups. Microscope – Zeiss Axio Observer.Z1. Original magnification – 20x. Scale bar – 100 µm. cv – central vein.

**Figure S6.** hBM-MSC attenuate thrombospondin-1-positive platelets in the liver after two-thirds partial hepatectomy

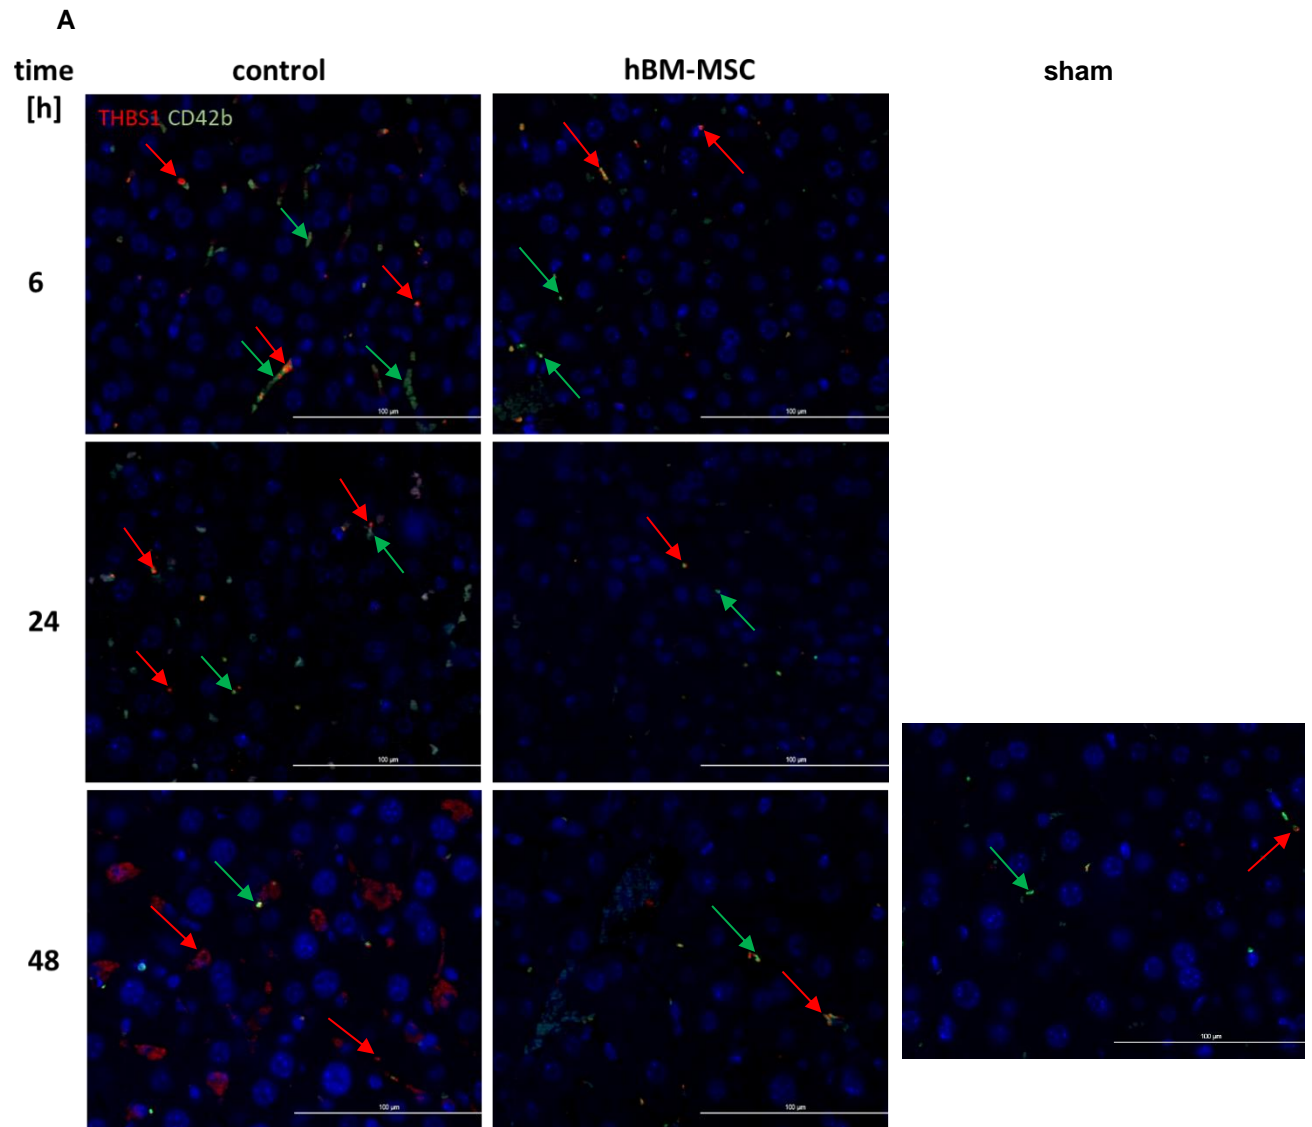

Platelets were marked with CD42b at the times indicated and detected by immunofluorescence (green fluorescence, green arrows). Red fluorescence indicates THBS1 (red arrows). Co-localization of the two markers delineates thrombocytes as potential source of THBS1. At any point in time, thrombocytes are obviously diminished by the treatment with hBM-MSC. At 48 h after partial hepatectomy, besides platelets other cells are detected by the THBS1 stain indicating a different cell source of THBS1. Images shown are representative for different tissue slices from 2-6 mice out of the different groups. 7-27 microscopic fields from the different groups were used for quantitative image analysis of data shown in Figure 4 of the main manuscript. Microscope – Zeiss Axio Observer.Z1 with ApoTome.2. Original magnification – 40x. Scale bar – 100  $\mu\text{m}$ .

**Figure S7.** hBM-MSC attenuate the increase of macrophages in the liver after two-thirds partial hepatectomy

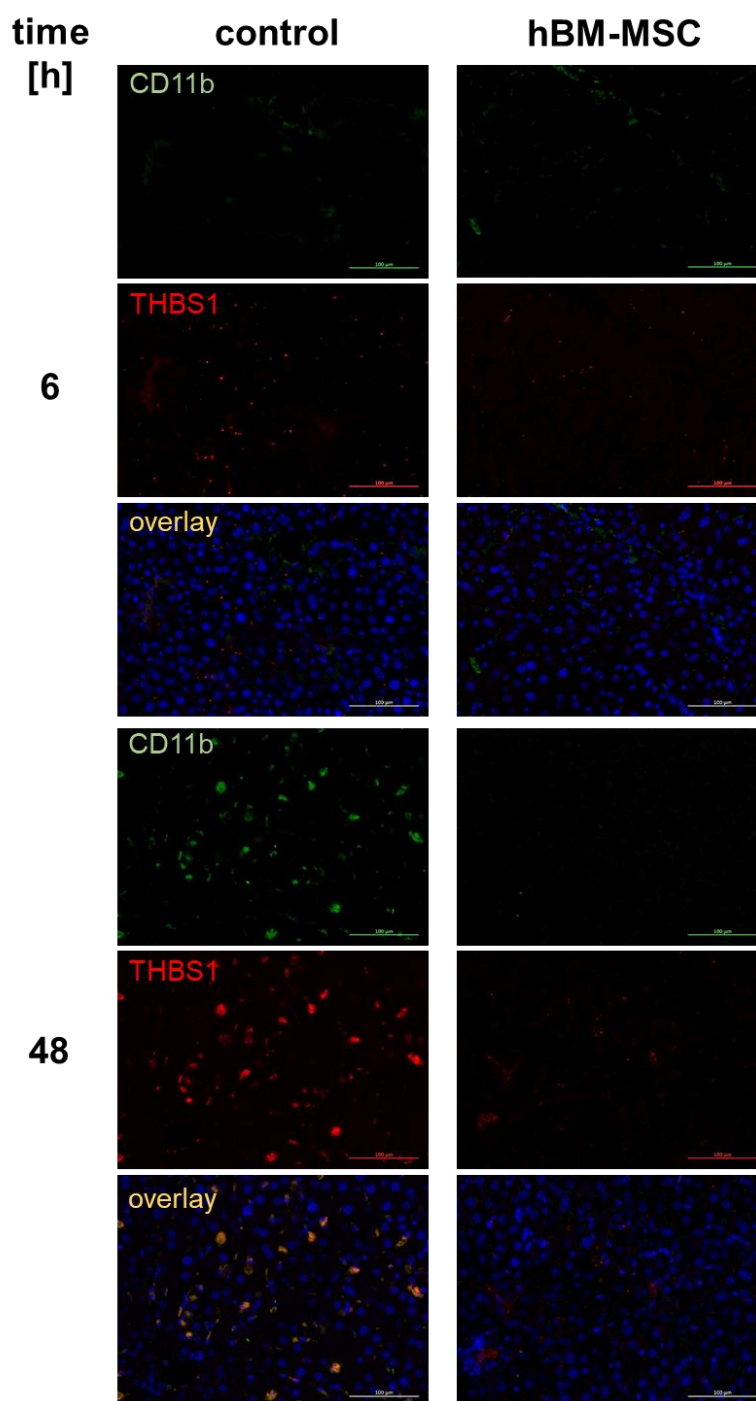

Macrophages were marked with CD11b at the times indicated and detected by immunofluorescence (green fluorescence). Red fluorescence indicates THBS1. Co-localization of the two markers delineates macrophages as potential source of THBS1. At any point in time, macrophages are obviously diminished by the treatment with hBM-MSC. Images shown are representative for different tissue slices from 3 mice out of the different groups. Microscope – Zeiss Axio Observer.Z1 with ApoTome.2. Original magnification – 20x. Scale bar – 100  $\mu\text{m}$ .

**Figure S8.** Tissue morphology and abundance of THBS1 in livers of patients undergone the ALPPS procedure

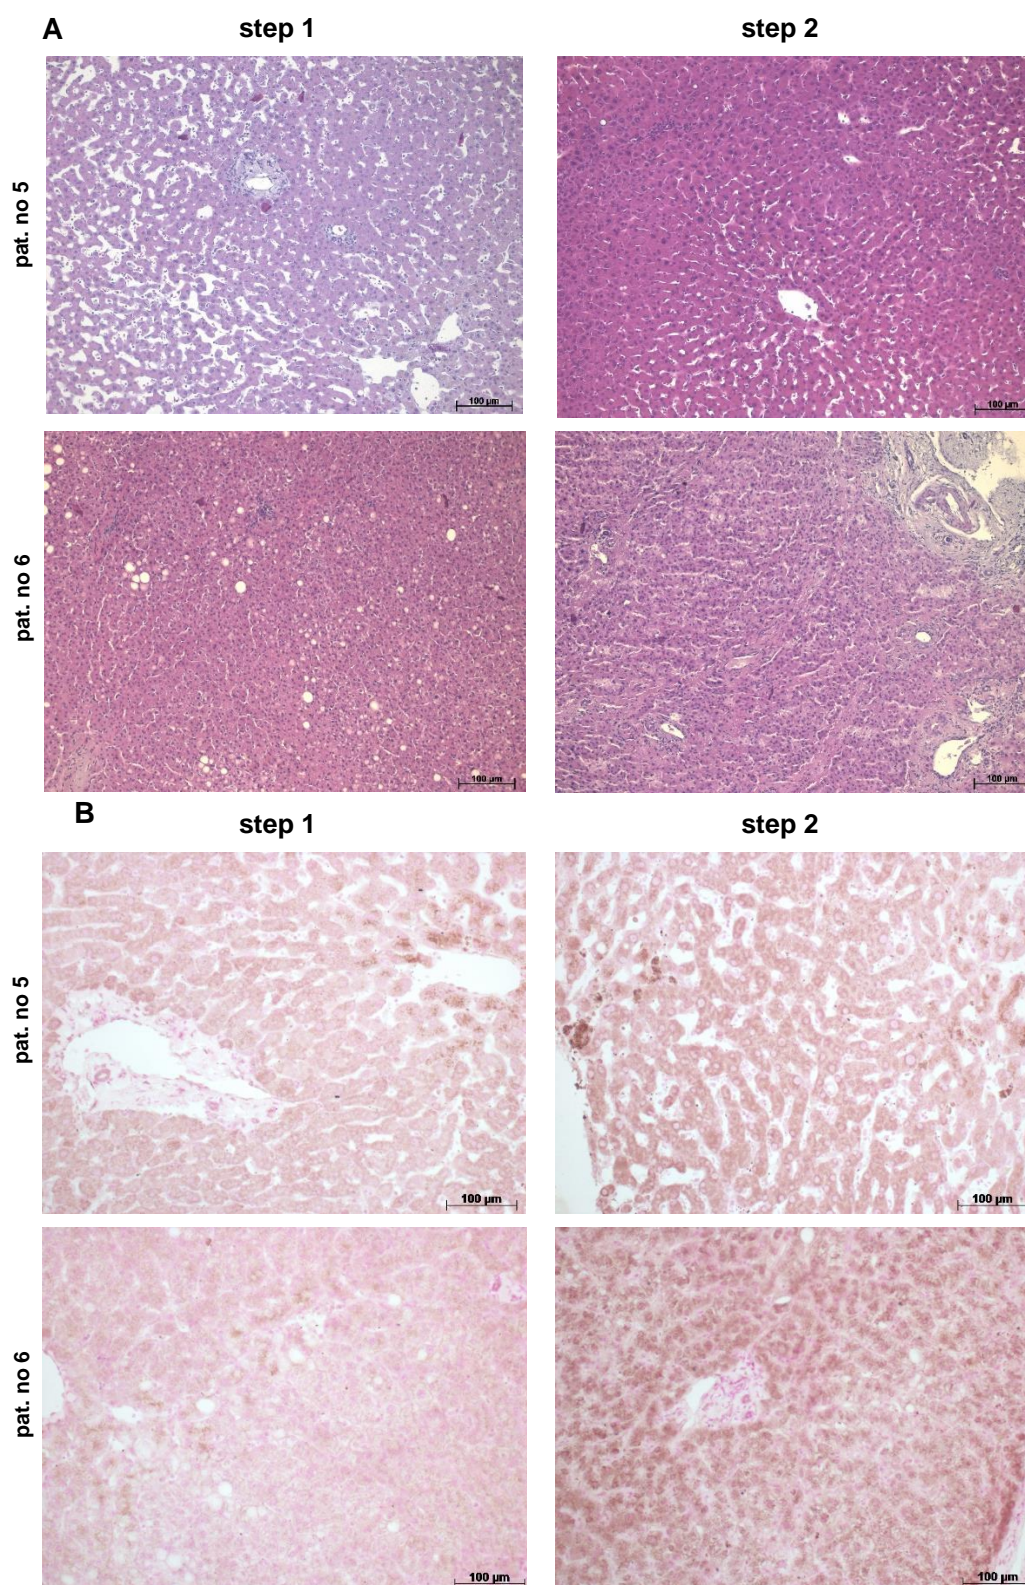

In (A), tissue morphology was depicted by HE staining and in (B), THBS1 was detected by immunohistochemistry. Tissue samples were taken at the time point of step 1 representing the situation at the starting point, and at step 2 featuring the time point of resection of the ligated liver lobe(s). At step 2,

biopsies were acquired from the future liver remnant. Microscope – Zeiss Axio Observer.Z1. Original magnification – 10x (A), 20x (B). Scale bar – 100  $\mu\text{m}$ .

**Figure S9.** Peri-operative time course of blood levels of albumin and the activated Partial Thromboplastin Time (aPTT) in patients undergone the ALPPS procedure

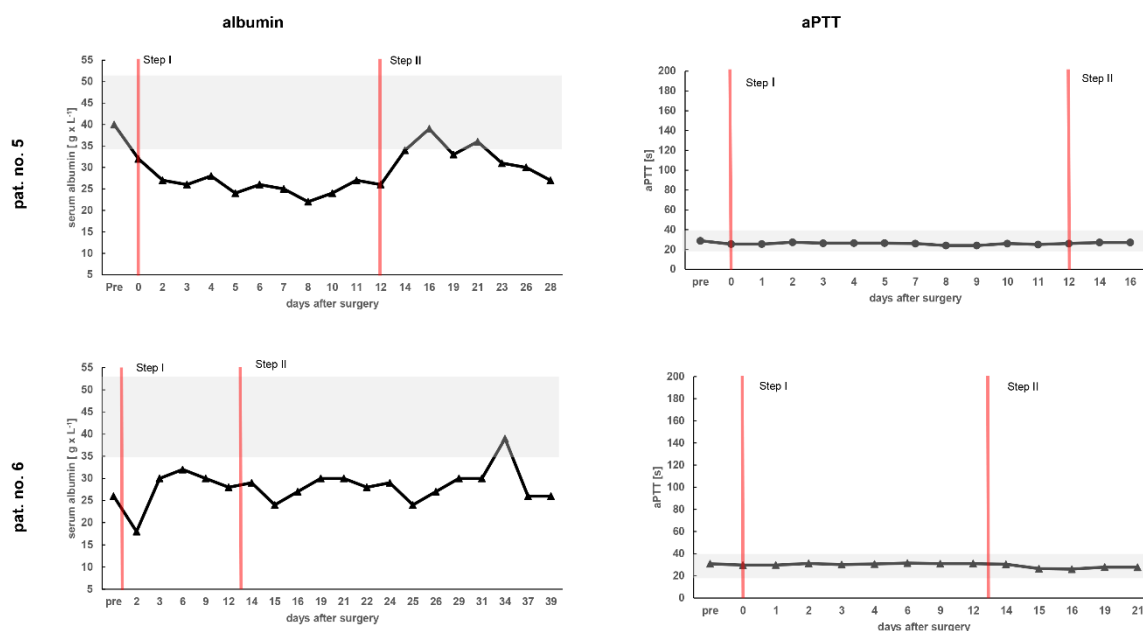

During the ALPPS procedure, albumin and the aPTT were determined in the patients' blood samples at the times indicated. The time points of step 1 and step 2 of the ALPPS procedure are marked with red vertical lines. Grey areas demarcate the range of physiological blood values.

## Supplementary Methods

**Table S1.** Summary of primer pairs and conditions used for semi-quantitative RT-PCR

| Gene Name                      | Primer Sequences<br>[5' → 3']                             | T <sub>A</sub><br>[°C] | Product Size<br>[bp] |
|--------------------------------|-----------------------------------------------------------|------------------------|----------------------|
| <i>B2M</i> (β-2-microglobulin) | F: TCTACTGGGATCGAGACATGTGA<br>R: ATTGCTATTTCTTTCTGCGTGCAT | 60                     | 124                  |
| <i>CDH1</i> (E-cadherin)       | F: GGACGTCCATGTGTGTGACT<br>R: GATCAGAATCAGCAGGGCGA        | 60                     | 134                  |
| <i>TJP1</i> (ZO-1)             | F: AGTTTCGGGTCCGAGGAG<br>R: CCCAGGAGCCCTGTGAA             | 60                     | 137                  |

F: forward primer; R: reverse primer; T<sub>A</sub>: annealing temperature; bp: base pairs.

**Table S2.** Summary of antibodies and their dilutions used in this study

| Antibody                           | Species | Dilution | Cat. No.    | Supplier                                    |
|------------------------------------|---------|----------|-------------|---------------------------------------------|
| THBS1                              | mouse   | 1:100    | ab1823      | Abcam, Cambridge, England                   |
| CD42b                              | rabbit  | 1:200    | ab183345    | Abcam, Cambridge, England                   |
| CD11b                              | rabbit  | 1:200    | ab133357    | Abcam, Cambridge, England                   |
| E-cad                              | mouse   | 1:200    | 610182      | BD, Heidelberg, Germany                     |
| N-cad                              | mouse   | 1:200    | 610920      | BD, Heidelberg, Germany                     |
| ZO-1                               | rabbit  | 1:100    | 40-2200     | InVitrogen, Carlsbad, CA, USA               |
| CYP2E1                             | rabbit  | 1:100    | ab28146     | Abcam, Cambridge, England                   |
| GS                                 | mouse   | 1:1000   | 610518      | BD, Heidelberg, Germany                     |
| GS (N-cad co-stain)                | rabbit  | 1:500    | Ab73593     | Abcam, Cambridge, England                   |
| Ki67                               | rabbit  | 1:200    | ab66155     | Abcam, Cambridge, England                   |
| Biotin-SP-conjugated anti-rabbit   | goat    | 1:200    | 111-065-003 | Dianova, Hamburg, Germany                   |
| AlexaFluor 488-labeled anti-rabbit | goat    | 1:200    | A11008      | Thermo Fisher Scientific, Dreieich, Germany |
| Cy3-labeled anti-mouse             | goat    | 1:200    | 115-165-003 | Dianova, Hamburg, Germany                   |
| Biotin-labeled anti-mouse          | goat    | 1:200    | 115-065-003 | Dianova, Hamburg, Germany                   |

**Table S3.** Summary of antibodies used for flow cytometry

| <b>Antibody</b>                    | <b>Label</b>                      | <b>Clone</b> | <b>Cat. No.</b> | <b>Supplier</b>                              | <b>Dilution</b> |
|------------------------------------|-----------------------------------|--------------|-----------------|----------------------------------------------|-----------------|
| Hu/mo anti-CD62P (P-Selectin)      | allophycocyanin (APC)             | Psel.KO2.3   | 17-0626-82      | Thermo Fisher Scientific, Darmstadt, Germany | 1:200           |
| Mouse IgG1 kappa Isotype Control   | allophycocyanin (APC)             | P3.6.2.8.1   | 17-4714-42      | Thermo Fisher Scientific, Darmstadt, Germany | 1:200           |
| rat anti-mouse CD41                | fluorescein isothiocyanate (FITC) | MWReg30      | 553848          | BD Pharmingen, Heidelberg, Germany           | 1:200           |
| Rat IgG1, $\kappa$ Isotype Control | fluorescein isothiocyanate (FITC) | R3-34        | 553924          | BD Pharmingen, Heidelberg, Germany           | 1:200           |

**Table S4.** Summary of serum transaminases after two-thirds partial hepatectomy.

| Mouse identity | Treatment | Time [h] | AST [ $\mu$ kat/l] | ALT [ $\mu$ kat/l] | De-Ritis-q. [AST/ALT] | Mean | SEM  | $P^1$ |                 |
|----------------|-----------|----------|--------------------|--------------------|-----------------------|------|------|-------|-----------------|
| M1053          | sham      | 6        | 4                  | n.d.               | -                     |      |      |       |                 |
| M1054          | sham      | 6        | 4                  | n.d.               | -                     |      |      |       |                 |
| M1055          | sham      | 6        | 4                  | n.d.               | -                     |      |      |       |                 |
|                |           |          |                    |                    |                       | -    | -    |       |                 |
| M1025          | control   | 6        | 48                 | 44                 | 1.09                  |      |      |       |                 |
| M1026          | control   | 6        | 48                 | 52                 | 0.92                  |      |      |       |                 |
| M1039          | control   | 6        | 48                 | 52                 | 0.92                  |      |      |       |                 |
| M1040          | control   | 6        | 38                 | 32                 | 1.19                  |      |      |       |                 |
| M1046          | control   | 6        | 34                 | 28                 | 1.21                  |      |      |       |                 |
| M1047          | control   | 6        | 84                 | 26                 | 3.23                  |      |      |       |                 |
| M1048          | control   | 6        | 54                 | 22                 | 2.45                  |      |      |       |                 |
|                |           |          |                    |                    |                       | 1.57 | 0.34 |       |                 |
| M1027          | hBM-MSC   | 6        | 78                 | 90                 | 0.87                  |      |      |       |                 |
| M1032          | hBM-MSC   | 6        | 68                 | 54                 | 1.26                  |      |      |       |                 |
| M1033          | hBM-MSC   | 6        | 78                 | 72                 | 1.08                  |      |      |       |                 |
| M1034          | hBM-MSC   | 6        | 62                 | 24                 | 2.58                  |      |      |       |                 |
| M1035          | hBM-MSC   | 6        | 104                | 72                 | 1.44                  |      |      |       |                 |
| M1050          | hBM-MSC   | 6        | 32                 | 24                 | 1.33                  |      |      |       |                 |
| M1051          | hBM-MSC   | 6        | 36                 | 30                 | 1.20                  |      |      |       |                 |
|                |           |          |                    |                    |                       | 1.40 | 0.21 | 0.39  | vs. 6h control  |
| M1056          | sham      | 24       | 2                  | n.d.               | -                     |      |      |       |                 |
| M1057          | sham      | 24       | 2                  | n.d.               | -                     |      |      |       |                 |
| M1058          | sham      | 24       | 30                 | 16                 | 1.88                  |      |      |       |                 |
|                |           |          |                    |                    |                       | -    | -    |       |                 |
| M1041          | control   | 24       | 120                | 38                 | 3.16                  |      |      |       |                 |
| M1042          | control   | 24       | 176                | 50                 | 3.52                  |      |      |       |                 |
| M1043          | control   | 24       | 224                | 80                 | 2.80                  |      |      |       |                 |
| M1044          | control   | 24       | 56                 | 26                 | 2.15                  |      |      |       |                 |
| M1045          | control   | 24       | 162                | 34                 | 4.76                  |      |      |       |                 |
| M1052          | control   | 24       | 78                 | 38                 | 2.05                  |      |      |       |                 |
| M1083          | control   | 24       | 250                | 114                | 2.19                  |      |      |       |                 |
| M1084          | control   | 24       | 172                | 76                 | 2.26                  |      |      |       |                 |
|                |           |          |                    |                    |                       | 2.86 | 0.33 | 0.003 | vs. 6h control  |
| M1028          | hBM-MSC   | 24       | 218                | 106                | 2.06                  |      |      |       |                 |
| M1029          | hBM-MSC   | 24       | n.d.               | 70                 | -                     |      |      |       |                 |
| M1030          | hBM-MSC   | 24       | 174                | 106                | 1.64                  |      |      |       |                 |
| M1031          | hBM-MSC   | 24       | 50                 | 120                | 0.42                  |      |      |       |                 |
| M1036          | hBM-MSC   | 24       | 326                | 138                | 2.36                  |      |      |       |                 |
| M1037          | hBM-MSC   | 24       | n.d.               | 102                | -                     |      |      |       |                 |
| M1038          | hBM-MSC   | 24       | 144                | 58                 | 2.48                  |      |      |       |                 |
| M1089          | hBM-MSC   | 24       | 132                | 66                 | 2.00                  |      |      |       |                 |
| M1090          | hBM-MSC   | 24       | 200                | 104                | 1.92                  |      |      |       |                 |
|                |           |          |                    |                    |                       | 1.84 | 0.26 | 0.02  | vs. 24h control |

|       |         |    |      |      |      |      |      |      |                 |
|-------|---------|----|------|------|------|------|------|------|-----------------|
| M1063 | sham    | 48 | n.d. | n.d. | -    |      |      |      |                 |
| M1064 | sham    | 48 | n.d. | n.d. | -    |      |      |      |                 |
| M1065 | sham    | 48 | 2    | n.d. | -    |      |      |      |                 |
|       |         |    |      |      |      | -    | -    |      |                 |
| M1059 | control | 48 | 26   | 14   | 1.86 |      |      |      |                 |
| M1061 | control | 48 | 214  | 70   | 3.06 |      |      |      |                 |
| M1062 | control | 48 | 204  | 78   | 2.62 |      |      |      |                 |
| M1078 | control | 48 | 118  | 32   | 3.69 |      |      |      |                 |
| M1079 | control | 48 | 194  | 28   | 6.93 |      |      |      |                 |
| M1080 | control | 48 | 38   | 24   | 1.58 |      |      |      |                 |
| M1081 | control | 48 | 202  | 50   | 4.04 |      |      |      |                 |
|       |         |    |      |      |      | 3.40 | 0.68 | 0.01 | vs. 6h control  |
| M1066 | hBM-MSC | 48 | 22   | 14   | 157  |      |      |      |                 |
| M1072 | hBM-MSC | 48 | 6    | 6    | 1.00 |      |      |      |                 |
| M1073 | hBM-MSC | 48 | 4    | 4    | 1.00 |      |      |      |                 |
| M1074 | hBM-MSC | 48 | 30   | 8    | 3.75 |      |      |      |                 |
| M1075 | hBM-MSC | 48 | 8    | 6    | 1.33 |      |      |      |                 |
| M1077 | hBM-MSC | 48 | 90   | 30   | 3.00 |      |      |      |                 |
| M1086 | hBM-MSC | 48 | n.d. | 146  | -    |      |      |      |                 |
| M1088 | hBM-MSC | 48 | n.d. | 156  | -    |      |      |      |                 |
|       |         |    |      |      |      | 1.94 | 0.47 | 0.04 | vs. 48h control |

<sup>1</sup> Statistics: Values are means  $\pm$  SEM from the number of animals as indicated. To assess for data normality, the Shapiro-Wilk and the Kolmogorov-Smirnov tests were applied. The tests revealed a deviation from normal distribution and a Johnson transformation was performed. Further statistical analysis between the different treatments were performed using the Student's t-test. Values are significantly different at the *P*-level as indicated.

n.d. not detectable; - not determined.
